# Supplementary material for: Zn Doping Effect on the Performance of Fe-Based Catalysts for the Hydrogenation of CO2 to Light Hydrocarbons
Source: MDPI journal article supplement (doi:10.3390/molecules27031065), 2022-02-04
Supplement: s1 [file s1]

## Supplementary Materials:

**Table S1.** Characteristics of the used catalyst carrier  $\text{ZrO}_2$ .

|                                                            |                                                         |
|------------------------------------------------------------|---------------------------------------------------------|
| Manufacturer                                               | Saint-Gobain                                            |
| Compound                                                   | 70–100 % $\text{ZrO}_2$ + 5–15% $\text{La}_2\text{O}_3$ |
| Surface area $S_{\text{BET}}$ , $\text{m}^2/\text{g}$      | 108                                                     |
| Pore volume $V_{\text{total}}$ , $\text{cm}^3/\text{g}$    | 0.234                                                   |
| Mesopore volume $V_{\text{meso}}$ , $\text{cm}^3/\text{g}$ | 0.234                                                   |
| Granule size, mm                                           | 0.25–0.50                                               |
| Bulk density, $\text{g}/\text{cm}^3$                       | 1.3                                                     |

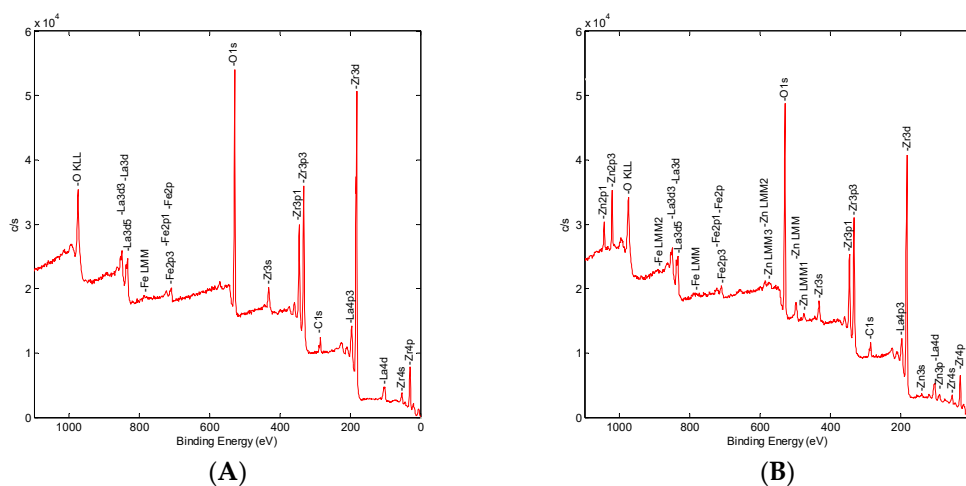

**Figure S1.** XPS spectra of catalyst samples 5%Fe/ $\text{ZrO}_2$  (A) and 5%Fe6%Zn/ $\text{ZrO}_2$  (B).

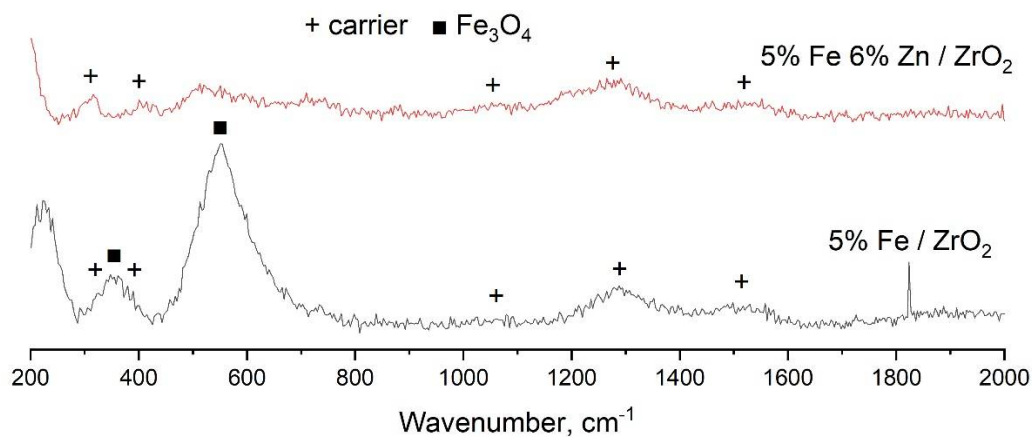

**Figure S2.** Raman spectra for the spent catalysts after the  $\text{CO}_2$  hydrogenation.
